# Supplementary material for: Bright and stable monomeric fluorescent proteins derived from StayGold
Source: Research Square preprint supplement (doi:10.21203/rs.3.rs-3188559/v1), 2023-07-27
Supplement: Supplementary file 1 [file 2a8ed27104548d0ad78e2138.docx]

**Supplementary Information**

**Bright and stable monomeric fluorescent proteins derived from StayGold**

Gleb D. Lesnov, Hanbin Zhang, Oksana M. Subach, Anna V. Vlaskina, Valeriya R. Samygina, Alena Yu. Nikolaeva, Azat Gabdulkhakov, Wenming Qin, Valentin Borshchevskiy, Maxim M. Perfilov, Alexander S. Mishin, Kiryl D. Piatkevich and Fedor V. Subach

**Supplementary Table 1. Spectral and biochemical characteristics of the selected state-of-art GFP.**

| **Protein** | **Abs,**  **Ex/Em (nm)** | **QY**  **(%)a** | **EC (mM−1·cm−1)b** | **Maturation Half-Time (min)** | **pKa** | **Monomeric State** | **Brightness**  **vs. EGFP (%)** | **Relative brightness in live mammalian cells, %** | | **Photobleaching Half-Time in solution (s) e** |
| --- | --- | --- | --- | --- | --- | --- | --- | --- | --- | --- |
| **HeLa** | **HEK** |
| **mNeonGreen** | **505,**  **508/522 *** | **72 *** | **113 ± 10 *** | **17 *** | **4.88 ± 0.05 *** | **Monomer *** | **242 *** | **1283 ± 102** | **ND** | **24 ± 5 *** |
| **StayGold** | **497,**  **500/508 *** | **93** | **148 ± 5 *** | **13 *** | **3.91 ± 0.02 *** | **Dimer *** | **410 *** | **100 ± 26** | **100 ± 44** | **129 ± 12 *** |
| **QC2-6 FIQ** | **ND,**  **499/510** | **83** | **164** | **ND** | **ND** | **Monomer** | **405** | **ND** | **ND** | **ND** |
| **StayGold-E138D** | **ND,**  **497/505** | **87** | **145** | **ND** | **4.6** | **Monomer** | **375** | **ND** | **212 ± 98** | **ND** |
| **mStayGold** | **497,**  **500/508** | **81** | **124 ± 13** | **5** | **4.26 ± 0.03** | **Monomer** | **299** | **1283 ± 91** | **1083 ± 289** | **80 ± 6** |

The data for the control proteins were from ref.1. * The data for control proteins marked by an asterisk were determined in this paper. ND, not determined. Mean ± standard deviation is shown.

**Supplementary Table 2.Crystallographic data collection and refinement statistics***.*

|  | pH 4.6 | pH6.5 |
| --- | --- | --- |
| **Data collection** | | |
| Wavelength (Å) | 1.54 | 0.97861 |
| Resolution range (Å) | 25.00 - 1.80  (1.87 - 1.80)a | 30-1.45 |
| Space group | *P212121* | *P21* |
| Cell parameters  a, b, c (Å) | 66.32 78.73 84.39  α = β = γ = 90, ( ◦ ) | 45.5 120.3 52.80  α = γ = 90, ( ◦ ) β= 105.95 |
| Collection temperature (K) | 120 | 100 |
| Total reflections | 130 605 (11 272) | 593765(22613) |
| Unique reflections | 41 116 (4 117) | 94189 (5529) |
| Multiplicity | 3.2 (2.7) | 6.3 (4.1) |
| Completeness (%) | 99.60 (94.40) | 97.7(77.8) |
| Mean I/sigma(I) | 6.98 (1.21) | 15.8(1.6) |
| Wilson B-factor (Å2 ) | 14.2 | 14.21 |
| CC1/2 | 0.99 (0.63) | 0.99 (0.671) |
| **Refinement** | | |
| Resolution range | 15.00 - 1.80  (1.84 - 1.80) | 15-1.45 |
| Reflections used in refinement | 34553 | 89431 |
| Reflections used for R-free | 1822 | 4627 |
| R-work, % | 20.28 | 13.0 |
| R-free, % | 28.7 | 16.7 |
| RMSD bond lengths (Å) | 0.014 | 0.012 |
| RMSD bond angles (◦) | 2.0841 | 1.936 |

**Supplementary Table 3. List of primers.**

| **BglII-SG** | GAC AGA TCT ATG GCT AGT ACA CCA TTT AAA TTT C |
| --- | --- |
| **SG-1** | ATG GCT AGT ACA CCA TTT AAA TTT CAA CTT AAA GGA ACC ATC AAT GGC AAA TCG TTT ACC GTT GAA GGC G |
| **SG-2-r** | GTA CAA ACA TAT TTT CCT TTA TGA GAA CCT TCA TGT GAA TTT CCT TCA CCT TCG CCT TCA ACG GTA AAC G |
| **SG-3** | AGG AAA ATA TGT TTG TAC AAG TGG AAA ACT ACC GAT GTC ATG GGC AGC ACT TGG AAC ATC CTT TGG TTA T |
| **SG-4-r** | CAT GAA ACC AGT TCT TCA GTC CAC TAG GAT ATT TGG TAT AAT ATT TCA TTC CAT AAC CAA AGG ATG TTC C |
| **SG-5** | TGA AGA ACT GGT TTC ATG AAG TAA TGC CTG AAG GCT TTA CCT ACG ATC GTC ATA TTC AAT ATA AAG GCG A |
| **SG-6-r** | GAT AAG TCC CAT TTT TCA TAA AGT GTT GGT GTT TTG CAT GGA TAC TCC CAT CGC CTT TAT ATT GAA TAT G |
| **SG-7** | TAT GAA AAA TGG GAC TTA TCA CAA CAT TGT TGA ATT TAC TGG TCA GGA TTT TAA AGA AAA TAG TCC AGT C |
| SG-8-r | GGT ATA TGT TGA ACT TCA TTC GGT AAT GAG ACA TTC ATA TCT CCA GTT AAG ACT GGA CTA TTT TCT TTA A |
| **SG-9** | AAT GAA GTT CAA CAT ATA CCC AGA GAT GAT GGA GTA GAA TGC CCA GTG ACC TTG CTT TAT CCT TTA TTA TC |
| **SG-10-r** | AAG AGG CTT GCA GAT TGT ATT TTG GTG AGC CTC AAC GCA TTT TGA TTT ATC CGA TAA TAA AGG ATA AAG C |
| **SG-11** | ATA CAA TCT GCA AGC CTC TTC ATA ATC AAC CAG CAC CTG ATG TCC CAT ATC ACT GGA TTC GTA AAC AAT A |
| **SG-12-r** | CTC TGA TTG ACA AAT ATG ATC ACG TTC CTC GGT ATC ATC TTT GCT TTG TGT GTA TTG TTT ACG AAT CCA G |
| **SG-13** | CAT ATT TGT CAA TCA GAG ACT CTC GAA GCA CAC TTA TAA |
| **SG-EcoRI-r** | TCG AAT TCT TAT AAG TGT GCT TCG AGA GTC |
| **Neon-BglII-2** | CGAGATCTATGGTCTCAAAGGGAGAGGAG |
| **Neon-EcoRI-rv3** | tcggaattccttatacagctcgtccatg |
| HindIII-stop-mSG-r | gacAAGCTTCTACTTATACAGCTCGTC |
| XhoI-mSG | **gacctcgag**ATGGTCTCAAAGGGAGAG |
| Neon-EcoRI-r2 | GCGAATTCCTACTTATACAGCTCGTCCATGC |
| BamHI-mSG | CAGGGATCCACCGGTCGCCACCATGGTCTCAAAGGGAGAG |
| mSG-dBsrGI | CATAAAGGAAAATATGTTTGcACAAGTGGAAAACTACCG |
| BsrGI-mSG-r | GCTTgTACAGCTCGTCCATGCCC |
| mSG-NotI-r | GTCGCGGCCGCCTACTTATACAGCTCGTC |
| KpnI-mSG | gacggtaccgcgggcccgggatccaccggtcgccaccATGGTCTCAAAGGGAGAGGAG |
| mStayGold-Actin-F | AGATCCGCTAGCGCTACCGGTCGCCACCATGGTCTCAAAGGGAGAGGAGGA |
| mStayGold-Actin-R | ATGCGCTGCCTCCACCGCTGCCAGATCTGAGTCCGGACTTATACAGCTCGTCCATGCCC |
| Actin-F | GGCAGCGGTGGAGGCAGCGCATCCGGCGGAAGCGGAAGCGATGATGATATCGCCGCGCT |
| Actin-R | ATCAGTTATCTAGATCCGGTGGATCCCTAGAAGCATTTGCGGTGGACGA |
| EB3-mStayGold-F | caggacgagtacctggatccaccggtcgccaccATGGTCTCAAAGGGAGAGGAGG |
| EB3-mStayGold-R | agtcgcggccaattcttacttgtacattaCTTATACAGCTCGTCCATGCCC |
| CytERM-mStayGold-F | GCGGGCCCGGGATCCACCGGTCGCCACCATGGTCTCAAAGGGAGAGGAGG |
| CytERM-mStayGold-R | TTATGATCTAGAGTCGCGGCCGCttaCTTATACAGCTCGTCCATGCCC |
| CytERM-StayGold-F | GCGGGCCCGGGATCCACCGGTCGCCACCatggctagtacaccatttaaatttcaactta |
| CytERM-StayGold-R | TTATGATCTAGAGTCGCGGCCGCttataagtgtgcttcgagagtctctgattg |
| CytERM-StayGold(E138D)-F | GCGGGCCCGGGATCCACCGGTCGCCACCatggctagtacaccatttaaatttcaactta |
| CytERM-StayGold(E138D)-R | TTATGATCTAGAGTCGCGGCCGCttataagtgtgcttcgagagtctctgattg |
| mStayGold-Tubulin-F | ctatagggagacccaagcttggtaccGCCACCATGGTCTCAAAGGGAGAGGAGG |
| mStayGold-Tubulin-R | ctcctcctgatccaccacctccCTTATACAGCTCGTCCATGCCC |
| Tubulin-F | aggtggtggatcaggaggaggtggttctggaggtggtggatcaggaggaagatctcgag |
| Tubulin-R | ggccctctagatccggtggatccttagtattcctctccttcttcctcaccctc |
| StayGold-Tubulin-F | agggagacccaagcttggtaccGCCACCatggctagtacaccatttaaatttcaactta |
| StayGold-Tubulin-R | ctcctcctgatccaccacctcctaagtgtgcttcgagagtctctgattg |
| StayGold-P2A-F | CAAAGAATTGGATCCGGTACCGCCACCatggctagtacaccatttaaatttcaactta |
| StayGold-P2A-R | CCACTTCCCACGTGAACCGGTCGtaagtgtgcttcgagagtctctgattgac |
| StayGold(E138D)-P2A-F1 | CAAAGAATTGGATCCGGTACCGCCACCatggctagtacaccatttaaatttcaactta |
| StayGold(E138D)-P2A-R1 | cattcggtaatgagacattcatatctccagtta |
| StayGold(E138D)-P2A-F2 | gaatgtctcattaccgaatgaCgttcaacatatacccagagatgatggagtagaat |
| StayGold(E138D)-P2A-R2 | CCACTTCCCACGTGAACCGGTCGtaagtgtgcttcgagagtctctgattgac |
| mStayGold-P2A-F | CAAAGAATTGGATCCGGTACCGCCACCATGGTCTCAAAGGGAGAGGAGG |
| mStayGold-P2A-R | CCACTTCCCACGTGAACCGGTCGCTTATACAGCTCGTCCATGCCC |

**Supplementary Figure 1.** Mutations found during evolution of mStayGold and amino acids sequences alignment for the StayGold and its selected mutants.

**
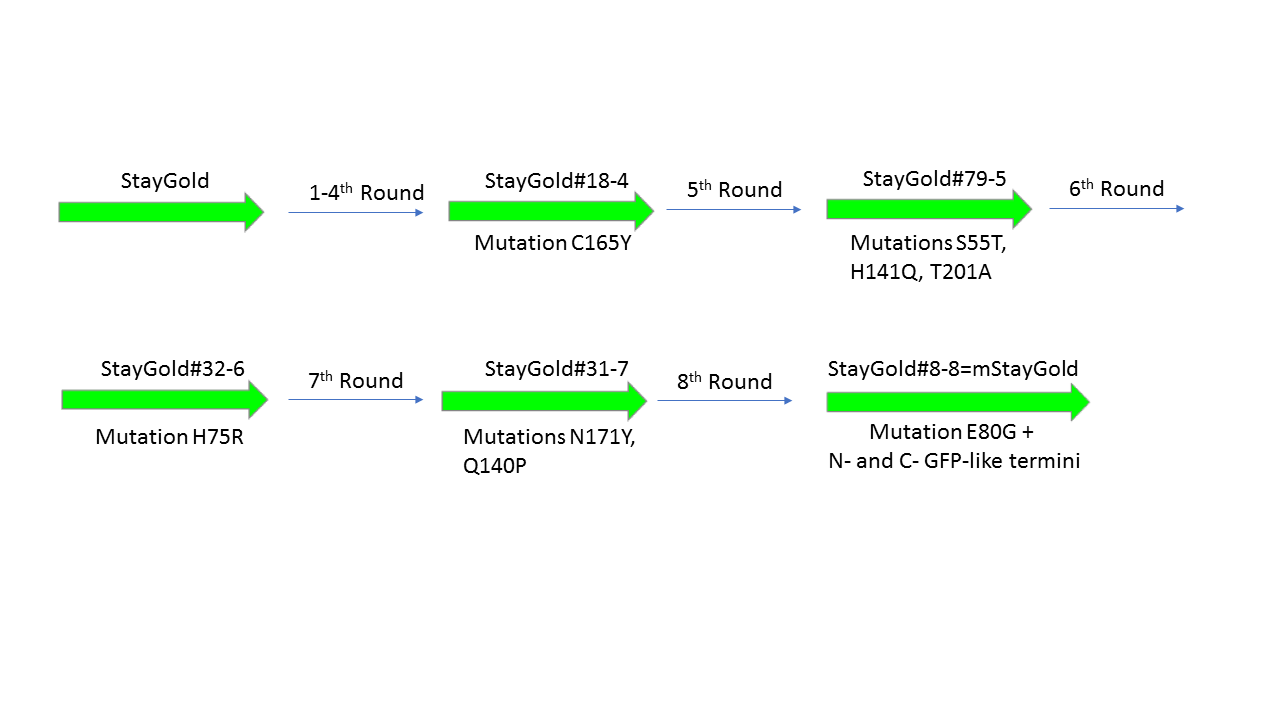

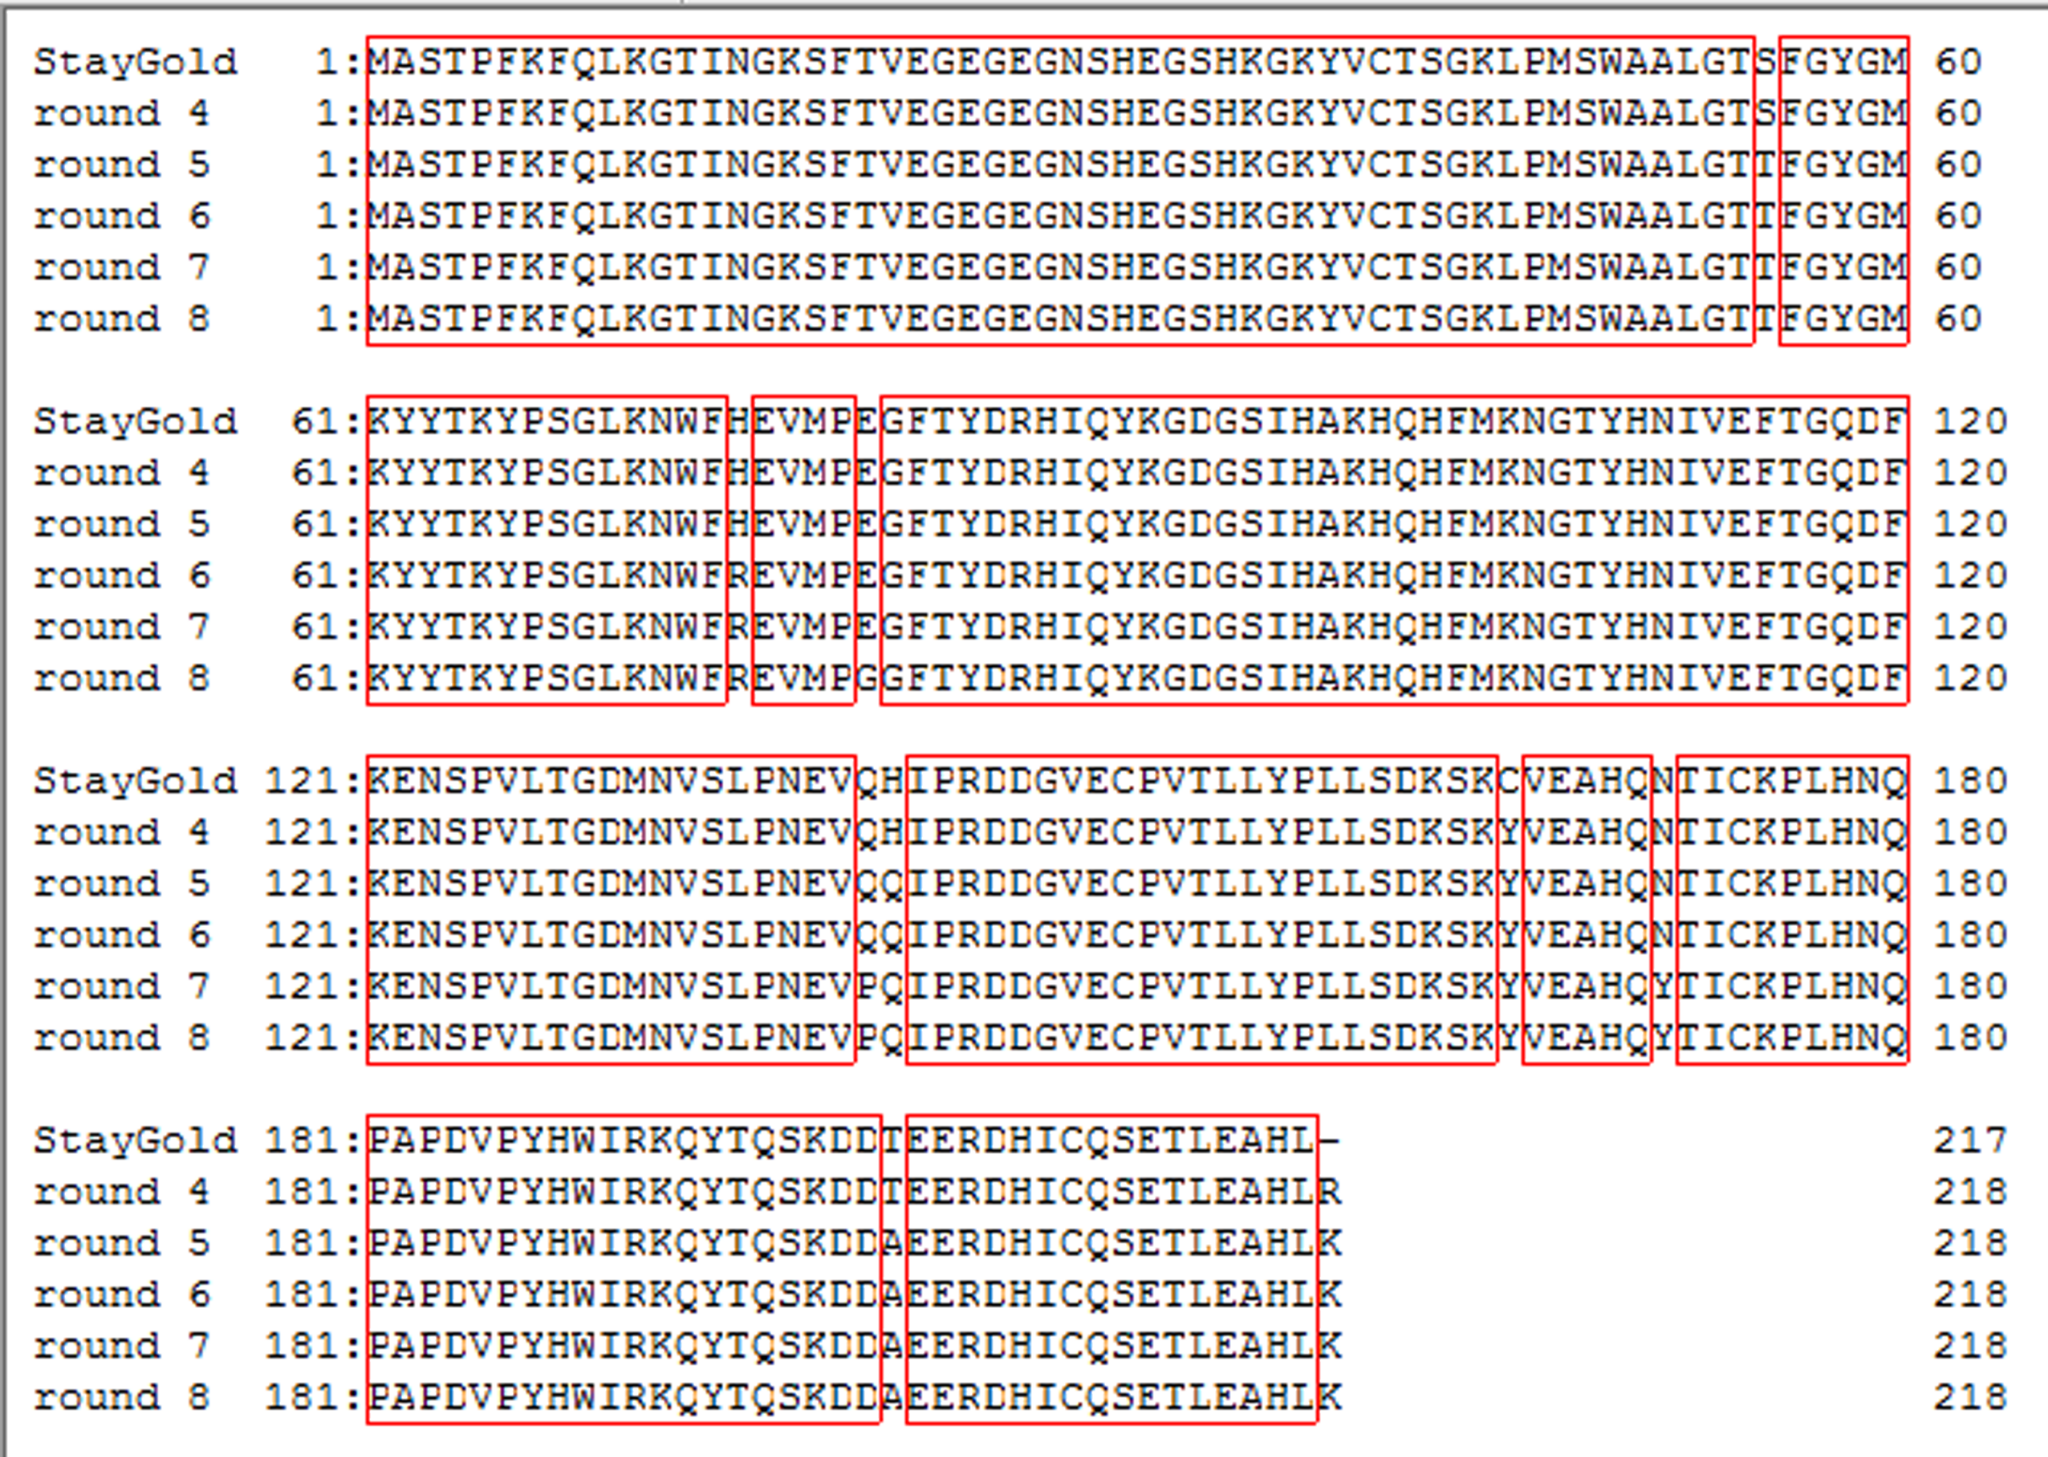
**

**Supplementary Figure 2.** Nucleotide sequence of the StayGold and mStayGold proteins.

**StayGold-stop gene;**

**atggctagtacaccatttaaatttcaacttaaaggaaccatcaatggcaaatcgtttaccgttgaaggcgaaggtgaaggaaattcacatgaaggttctcataaaggaaaatatgtttgtacaagtggaaaactaccgatgtcatgggcagcacttggaacatcctttggttatggaatgaaatattataccaaatatcctagtggactgaagaactggtttcatgaagtaatgcctgaaggctttacctacgatcgtcatattcaatataaaggcgatgggagtatccatgcaaaacaccaacactttatgaaaaatgggacttatcacaacattgttgaatttactggtcaggattttaaagaaaatagtccagtcttaactggagatatgaatgtctcattaccgaatgaagttcaacatatacccagagatgatggagtagaatgcccagtgaccttgctttatcctttattatcggataaatcaaaatgcgttgaggctcaccaaaatacaatctgcaagcctcttcataatcaaccagcacctgatgtcccatatcactggattcgtaaacaatacacacaaagcaaagatgataccgaggaacgtgatcatatttgtcaatcagagactctcgaagcacacttataa**

**mStayGold-stop gene:**

ATGGTCTCAAAGGGAGAGGAGGAAAACATGGCTAGTACACCATTTAAATTTCAACTTAAAGGAACCATCAATGGCAAATCGTTTACCGTTGAAGGCGAAGGTGAAGGGAAcTCACATGAAGGTTCTCATAAAGGAAAATATGTTTGTACAAGTGGAAAACTACCGATGTCATGGGCAGCACTTGGGACAACCTTTGGTTATGGAATGAAATATTATACCAAATATCCTAGTGGACTGAAGAACTGGTTTCGTGAAGTAATGCCCGGAGGCTTTACCTACGATCGTCATATTCAATATAAAGGCGATGGGAGTATCCATGCAAAACACCAACACTTTATGAAAAATGGGACTTATCACAACATTGTAGAATTTACCGGTCAGGATTTTAAAGAAAATAGTCCAGTCTTAACTGGAGATATGAATGTCTCATTACCGAATGAAGTCCCACAAATACCCAGAGATGATGGAGTAGAATGCCCAGTGACCTTGCTTTATCCTTTATTATCGGATAAATCAAAATACGTCGAGGCTCACCAATATACAATCTGCAAGCCTCTTCATAATCAACCAGCACCTGATGTCCCATATCACTGGATTCGTAAACAATACACACAAAGCAAAGATGATGCCGAGGAACGCGATCATATCTGTCAATCAGAGACTCTCGAAGCACACTTAAAGGGCATGGACGAGCTGTATAAGTAG

**Supplementary Figure 3.** Alignment of monomeric versions of StayGold.


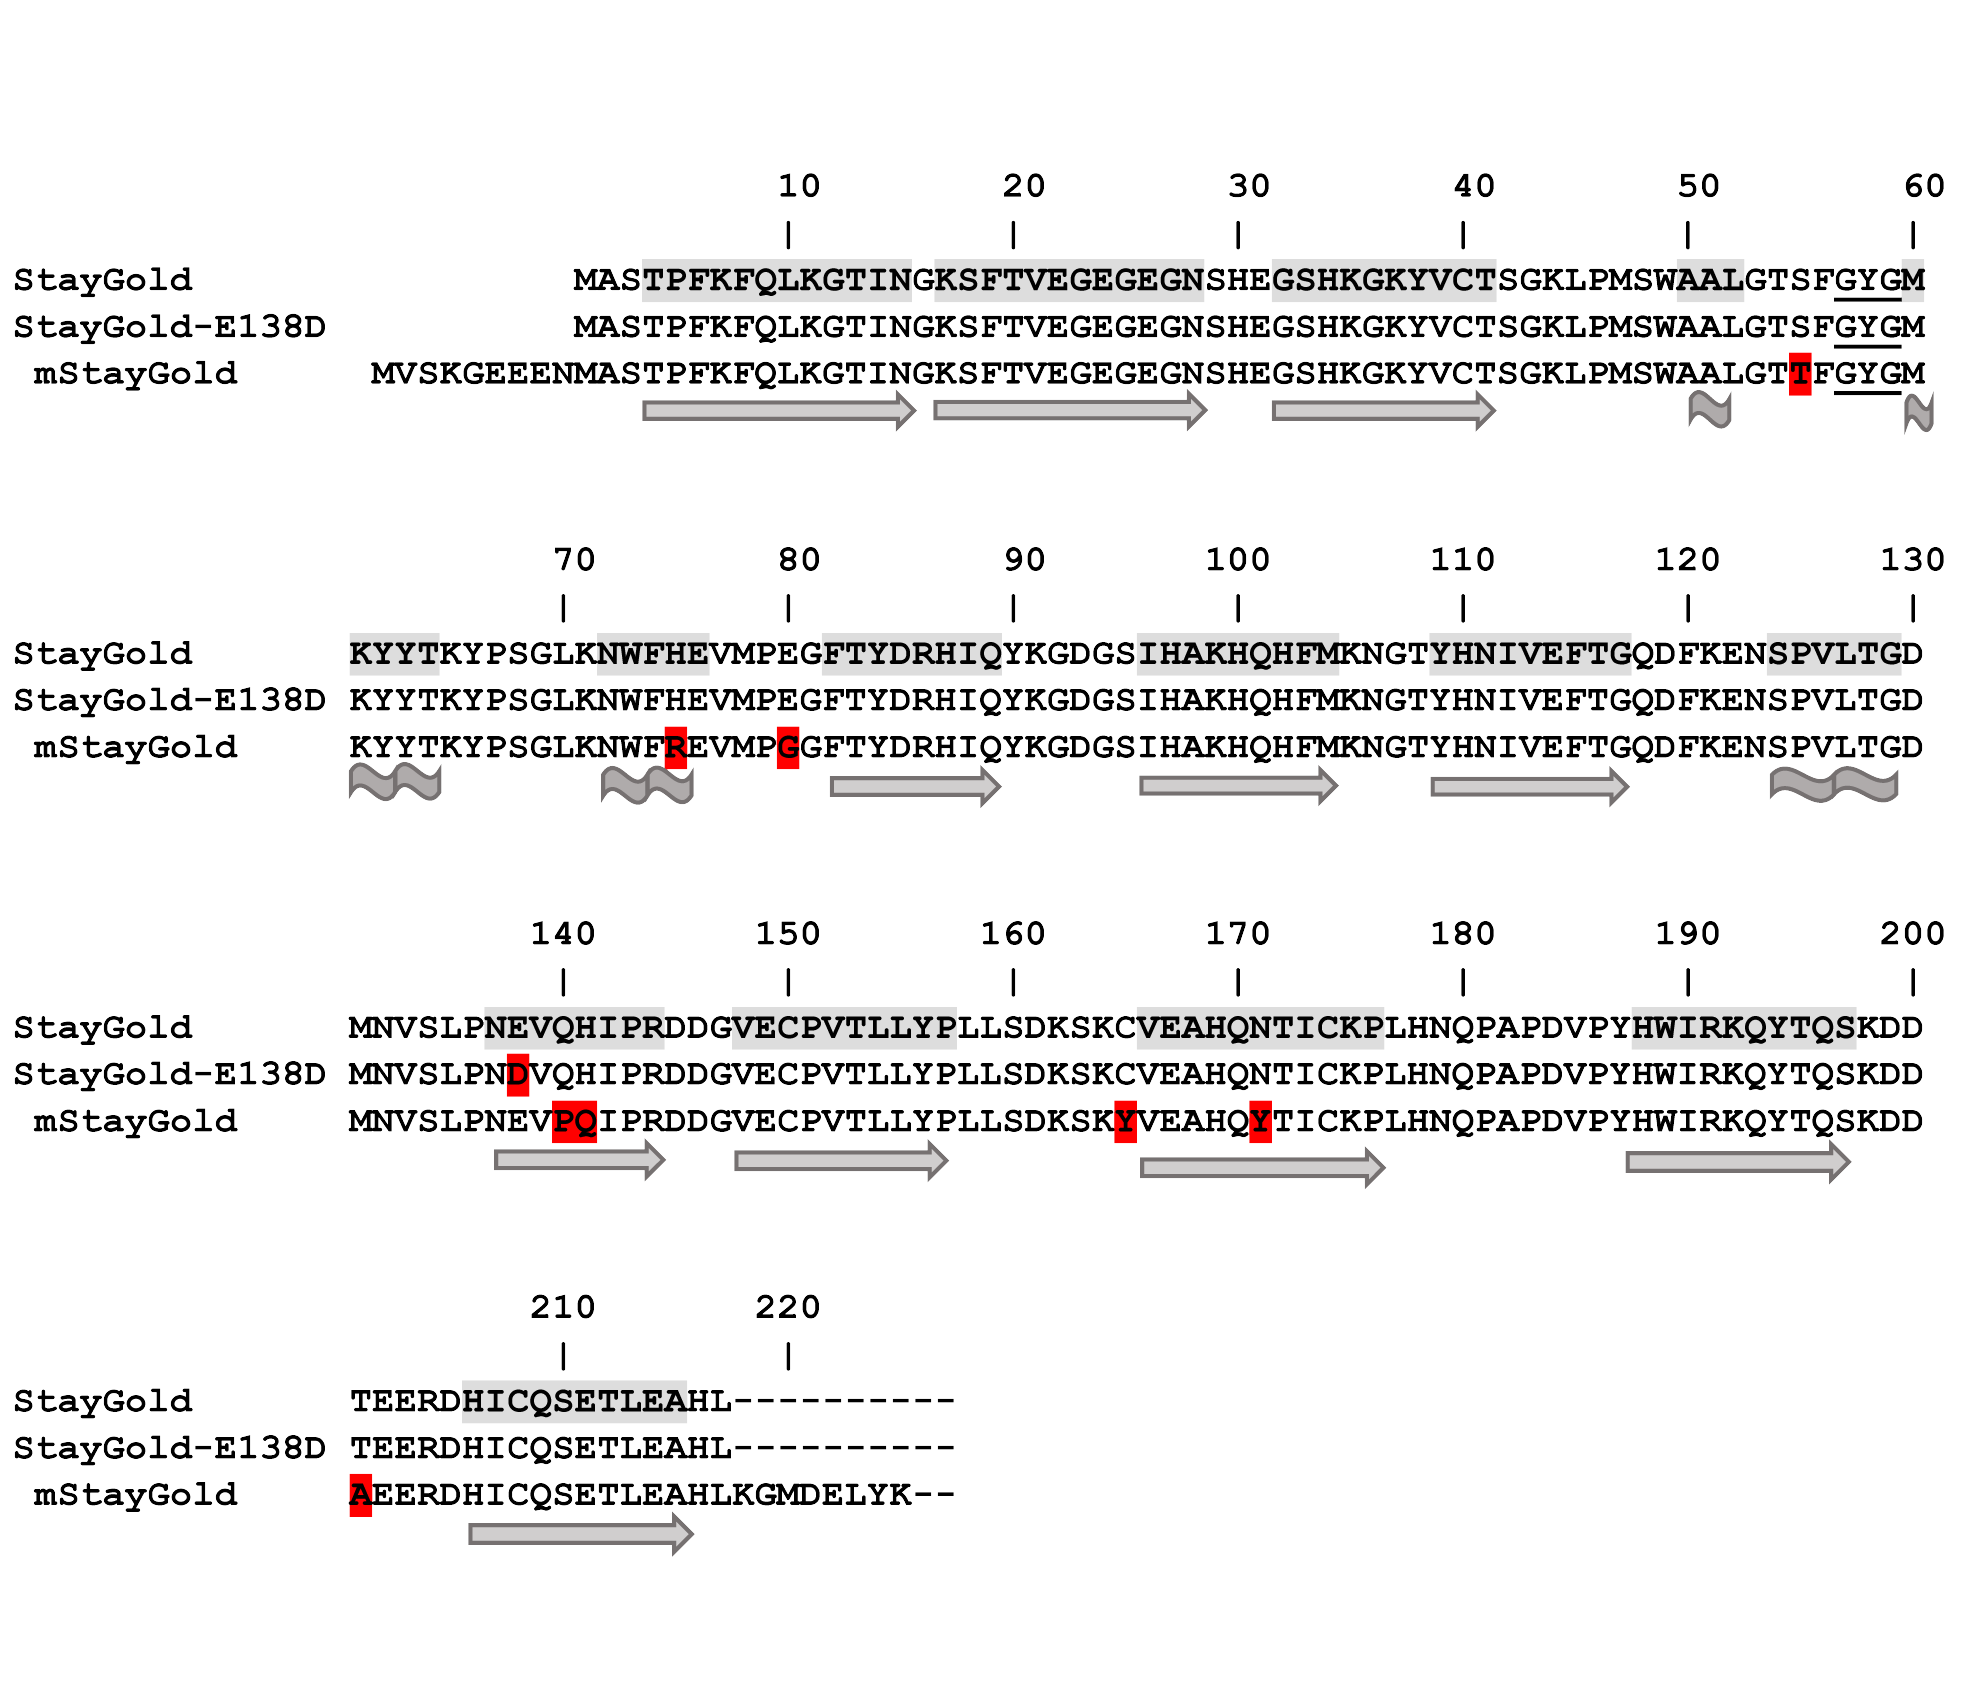


Mutations are highlighted in red. Enumeration of the residues follows that for StayGold.

**Supplementary Figure 4.** Analysis of the mutations found in mStayGold protein.


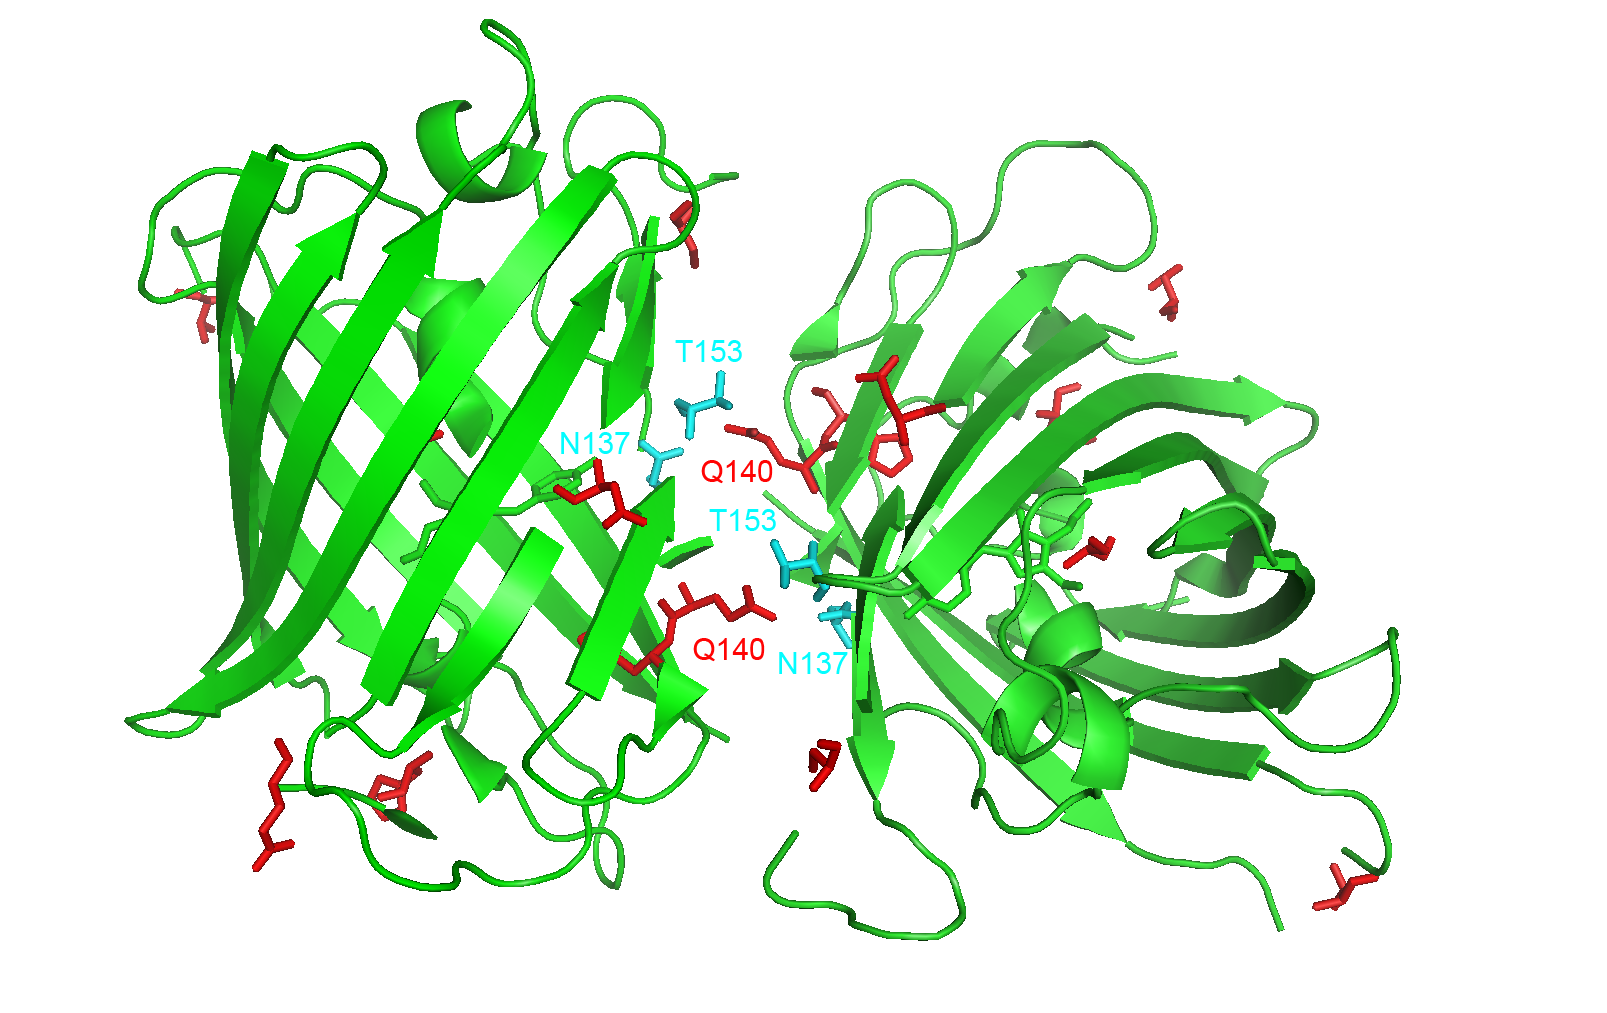


Cartoon representation of the StayGold dimer (PDB ID 7Y40). Mutated residues in mStayGold are shown in red as sticks. Q140 residues from both subunits form symmetric contracts with T153 and N137 from another dimer which are shown in cyan and are 3Å close to Q140.

**Supplementary Figure 5.** Absorption, excitation, emission spectra of mStayGold and comparison of photostabilities of the purified mStayGold, StayGold and mNeonGreen proteins in microdroplets in oil.

**
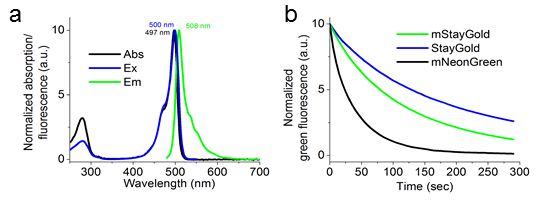
**

(a) Spectra were recorded in the PBS buffer, pH 7.40. (b) Protein droplets were photobleached under continuous wide-field illumination with mercury arc lamp, a 63x 1.4 NA oil immersion objective lens, a 470/40BP excitation filter, a FT 495 beam splitter, and 525/50BP emission filter. Light power density of 64 mW/cm2 was measured at a rear focal plane of the objective lens.

**Supplementary Figure 6.** Localization and comparison of the brightness of the mStayGold with StayGold and mNeonGreen in HeLa cells.

**
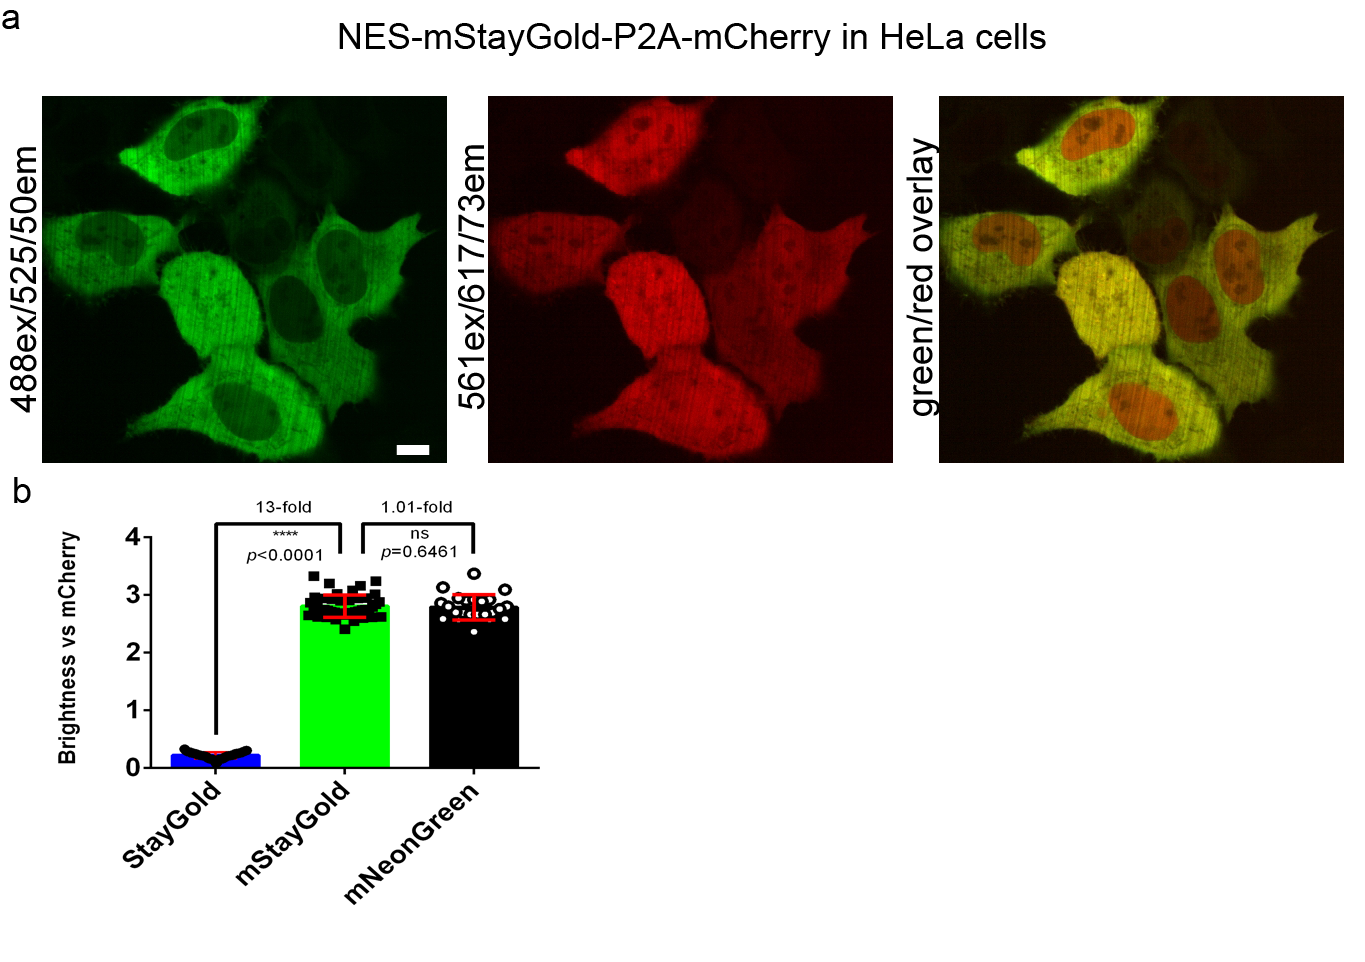
**

(a) Confocal images of the HeLa cells transiently expressing NES-mStayGold-P2A-mCherry fusion. (b) Comparison of the brightness of mStayGold normalized to the brightness of the mCherry protein with the normalized brightness of the StayGold and mNeonGreen proteins.

**Supplementary Figure 7.** Localization microscopy of mStayGold in various acquisition speed regimes. (a) Photostability of mStayGold.

**
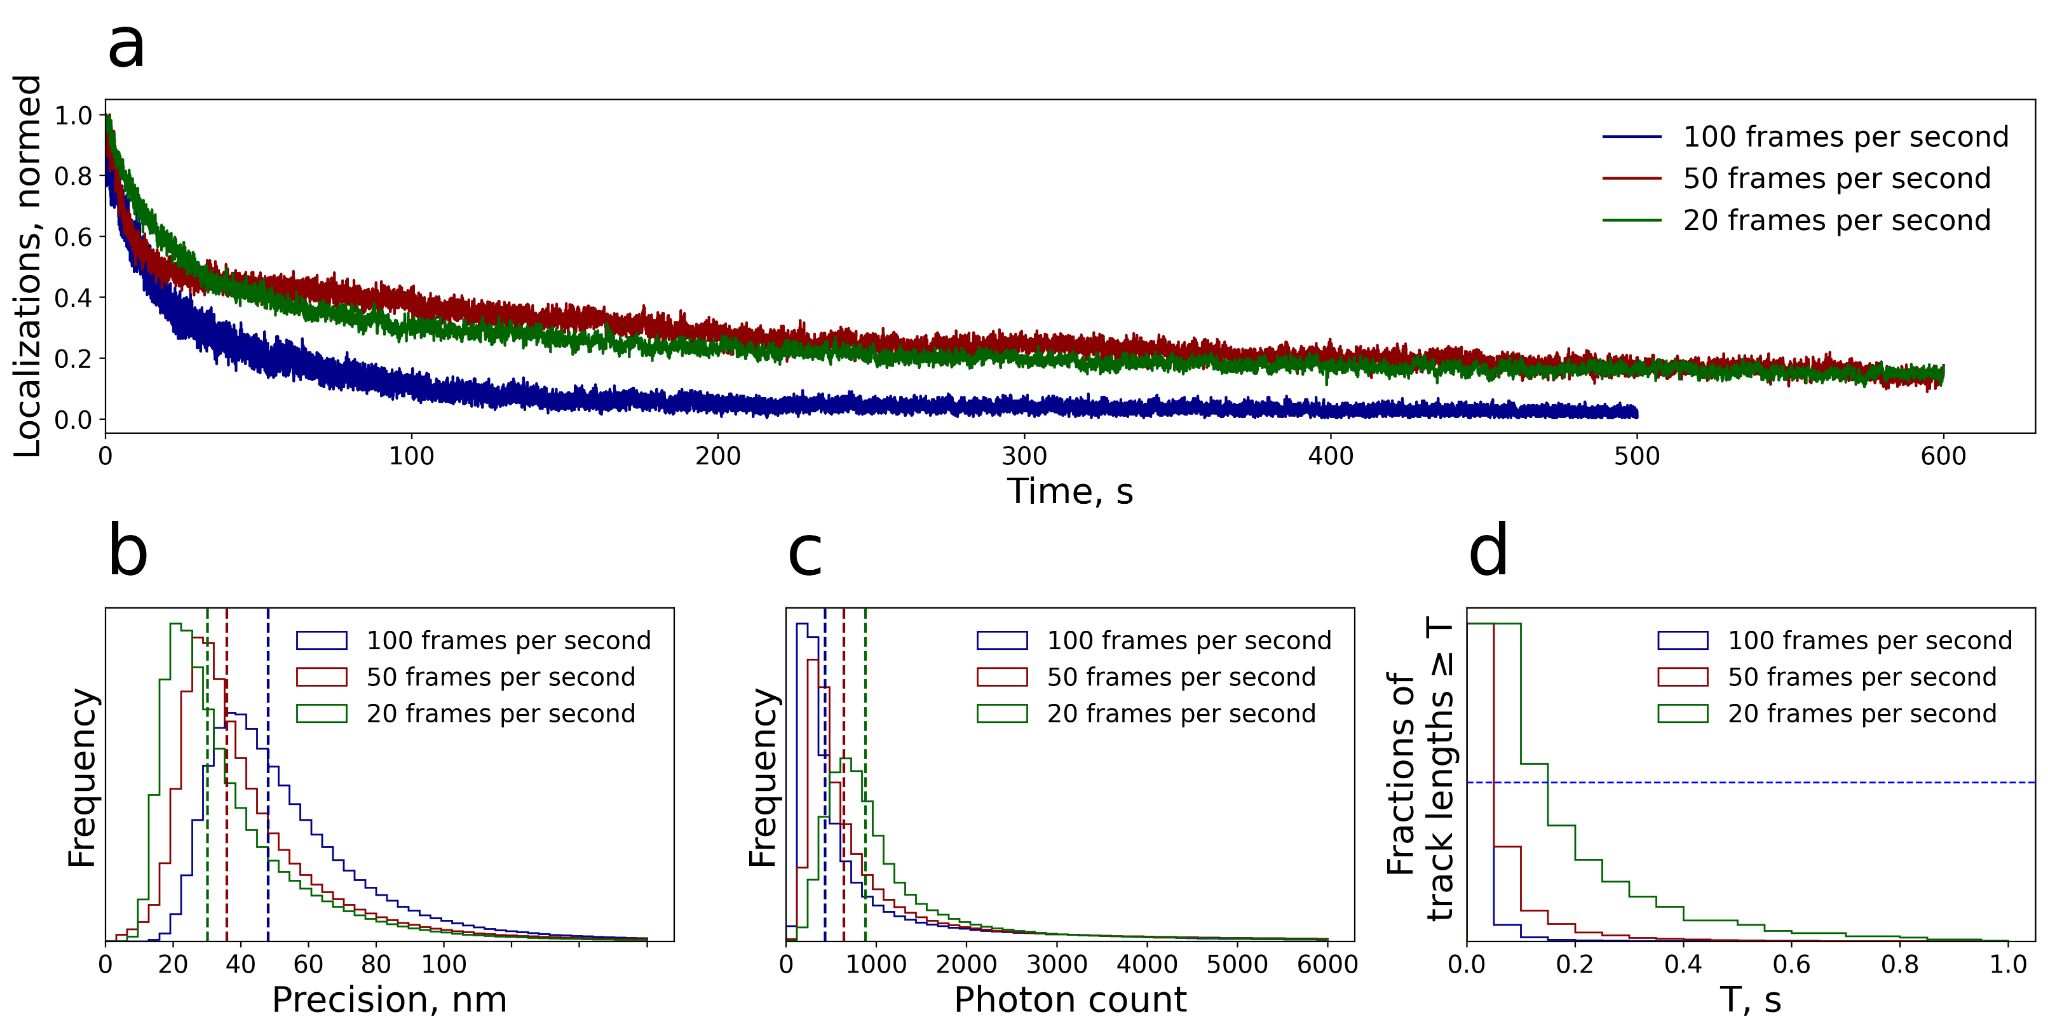
**

The graph shows a normalized number of localizations per frame. (b) The histogram of precision of localizations reconstruction, calculated as mean of X-axis precision and Y-axis precision; vertical dashed lines represent median values. (c) The histogram of detected photons per single-molecule burst of fluorescence; vertical dashed lines represent median values. (d) The cumulative distributions of track lengths. Horizontal line indicated the median of the distribution.

**Supplementary Video 1.** Long-term super-resolution imaging of tubulin dynamics in HeLa cells using CSU-W1 SoRa imaging setup (100x NA1.41, sampling rate 0.2 Hz, total duration 60 min).

**Supplementary Video 2.** Long-term super-resolution imaging of actin dynamics in HeLa cells using CSU-W1 SoRa imaging setup (100x NA1.41, sampling rate 0.2 Hz, total duration 30 min).

**Supplementary Video 3.** Long-term super-resolution imaging of EB3 dynamics in HeLa cells using CSU-W1 SoRa imaging setup (100x NA1.41, sampling rate 1 Hz, total duration 2:30 min).

**Supplementary Video 4.** Long-term super-resolution imaging of actin dynamics in HeLa cells using HIS-SIM imaging setup (100x NA1.41, total duration 15 min).

**References:**

1. Hirano, M. *et al.* A highly photostable and bright green fluorescent protein. *Nat. Biotechnol. 2022 407* **40**, 1132–1142 (2022).
